# Supplementary material
Source: Research Square preprint supplement (doi:10.21203/rs.3.rs-10119958/v1)
Supplement: Supplementary file 2 [file 63ef3a5afcd595710e7db7f7.xlsx]

## Sheet: data
Publication Years	Publication Years_Count	Document Types	Document Types_Count	Researcher Profiles	Researcher Profiles_Count	Web of Science Categories	Web of Science Categories_Count	Citation Topics Meso	Citation Topics Meso_Count	Citation Topics Micro	Citation Topics Micro_Count	Sustainable Development Goals	Sustainable Development Goals_Count	Web of Science Index	Web of Science Index_Count	Affiliations	Affiliations_Count	Affiliation with Department	Affiliation with Department_Count	Publication Titles	Publication Titles_Count	Languages	Languages_Count	Countries/Regions	Countries/Regions_Count	Publishers	Publishers_Count	Research Areas	Research Areas_Count	Open Access	Open Access_Count	Funding Agencies	Funding Agencies_Count	Conference Titles	Conference Titles_Count	Book Series Titles	Book Series Titles_Count	Editors	Editors_Count
2026	11	Article	897	CANKURTARAN, Özlem	34	Chemistry Physical	282	3.83 Bioengineering	459	3.83.2296 Calorimetry & Chromatography	459	13 Climate Action	57	Science Citation Index Expanded (SCI-EXPANDED)	914	CENTRE NATIONAL DE LA RECHERCHE SCIENTIFIQUE CNRS	66	University Of Patras School Of Natural Sciences	29	JOURNAL OF CHROMATOGRAPHY A	108	English	914	USA	116	Elsevier	399	Chemistry	575	All Open Access	203	NATIONAL NATURAL SCIENCE FOUNDATION OF CHINA NSFC	33	1ST INTERNATIONAL CONFERENCE ON INVERSE GAS CHROMATOGRAPHY ICICGC 1	9	Studies In Surface Science And Catalysis	3	Cejka J	1
2025	19	Proceeding Paper	85	HAMIEH, Tayssir	32	Chemistry Analytical	172	2.89 Ionic, Molecular & Complex Liquids	86	2.241.1037 Membrane Gas Separation	42	06 Clean Water And Sanitation	48	Conference Proceedings Citation Index – Science (CPCI-S)	85	UNIVERSITE DE HAUTE ALSACE UHA	53	University Of Patras Department Of Chemistry	28	JOURNAL OF COLLOID AND INTERFACE SCIENCE	31			FRANCE	115	Amer Chemical Soc	103	Materials Science	195	Gold	45	EUROPEAN UNION EU	31	1ST INTERNATIONAL CONFERENCE ON INVERSE GAS CHROMATOGRAPHY ICIGC 1	6	Materials Science Forum	1	Froment GF	1
2024	28	Review Article	17	Cakar, Fatih	31	Engineering Chemical	154	2.41 Catalysts	56	2.89.508 Ionic Liquids	38	03 Good Health And Well Being	37	Arts & Humanities Citation Index (A&HCI)	1	UNIVERSITES DE STRASBOURG ETABLISSEMENTS ASSOCIES	53	Lebanese University Faculty Of Science	23	CHROMATOGRAPHIA	29			PEOPLES R CHINA	97	Springer Nature	86	Engineering	170	Gold-Hybrid	33	YILDIZ TECHNICAL UNIVERSITY	24	25TH INTERNATIONAL SYMPOSIUM ON CHROMATOGRAPHY	3			Mcenaney B	1
2023	24	Early Access	1	Roubani-Kalantzopoulou, F	30	Polymer Science	154	2.90 Water Treatment	45	2.90.27 Adsorption	33	12 Responsible Consumption And Production	20			UNIVERSITY OF PATRAS	51	Maastricht University Faculty Of Science And Engineering	20	COLLOIDS AND SURFACES A PHYSICOCHEMICAL AND ENGINEERING ASPECTS	28			GREECE	92	Wiley	75	Biochemistry Molecular Biology	154	Free to Read	34	SPANISH GOVERNMENT	22	2ND INTERNATIONAL SYMPOSIUM ON EFFECTS OF SURFACE HETEROGENEITY IN ADSORPTION AND CATALYSIS ON SOLIDS	3			Milonjic SK	1
2022	22			KATSANOS, N	28	Materials Science Multidisciplinary	149	2.241 Membrane Science	43	2.166.423 Chromatography Techniques	31	07 Affordable And Clean Energy	11			YILDIZ TECHNICAL UNIVERSITY	48	Yildiz Technical University Faculty Of Arts And Sciences	19	LANGMUIR	23			TURKEY	85	Taylor & Francis	51	Polymer Science	154	Green Published	25	EUROPEAN SOCIAL FUND ESF	9	13TH EUROPEAN CONFERENCE ON APPLICATIONS OF SURFACE AND INTERFACE ANALYSIS	2			Nachtigall P	1
2021	28			Karaiskakis, George	24	Biochemical Research Methods	143	2.166 Chromatography & Electrophoresis	33	2.22.336 Metal-organic Frameworks	27	02 Zero Hunger	5			NATIONAL TECHNICAL UNIVERSITY OF ATHENS	31	National Technical University Of Athens School Of Chemical Engineering	18	JOURNAL OF APPLIED POLYMER SCIENCE	21			POLAND	79	Mdpi	28	Physics	61	Green Accepted	3	RUSSIAN SCIENCE FOUNDATION RSF	9	21ST BIENNIAL CONFERENCE ON CARBON	2			Rakovic DI	1
2020	29			Gavril, Dimitrios	23	Chemistry Multidisciplinary	126	2.22 Inorganic & Nuclear Chemistry	30	2.89.1973 Thermal Diffusion	26	11 Sustainable Cities And Communities	3			LEBANESE UNIVERSITY	25	Eskişehir Osmangazi University Faculty Of Engineering And Architecture	16	MICROPOROUS AND MESOPOROUS MATERIALS	15			SPAIN	63	Royal Soc Chemistry	23	Science Technology Other Topics	44	Green Submitted	148	NATIONAL RESEARCH FOUNDATION OF KOREA	8	22ND INTERNATIONAL SYMPOSIUM ON CHROMATOGRAPHY ISC 98	2			Rodriguezreinoso F	1
2019	25			Diaz, Eva	20	Chemistry Applied	52	2.39 Polymer Science	23	2.41.144 Zeolite Catalysis	22	14 Life Below Water	1			CONSEJO SUPERIOR DE INVESTIGACIONES CIENTIFICAS CSIC	24	Anadolu University Faculty Of Engineering And Architecture	14	JOURNAL OF MOLECULAR LIQUIDS	14			ENGLAND	58	Marcel Dekker Inc	9	Thermodynamics	44			UK RESEARCH INNOVATION UKRI	8	FALL MEETING OF THE AMERICAN CHEMICAL SOCIETY RUBBER DIVISION	2			Rouquerol J	1
2018	18			Guskov, Vladimir	20	Thermodynamics	44	2.53 Polymers & Macromolecules	10	2.41.148 Mesoporous Silica	17	15 Life On Land	1			XINJIANG UNIVERSITY	23	Jan Kochanowski University Of Kielce Faculty Of Natural Sciences	13	FLUID PHASE EQUILIBRIA	13			GERMANY	39	Dr Alfred Huthig Verlag Gmbh	6	Pharmacology Pharmacy	27			CONSEJO NACIONAL DE CIENCIA Y TECNOLOGIA CONACYT	7	10TH INTERNATIONAL SYMPOSIUM ON EFFECTS OF SURFACE HETEROGENEITY IN ADSORPTION CATALYSIS AND RELATED PHENOMENA ISSHAC	1			Unger K	1
2017	21			Ordonez, Salvador	20	Nanoscience Nanotechnology	34	2.76 2d Materials	10	2.39.539 Rubber Blends	14					UFA UNIVERSITY OF SCIENCE TECHNOLOGY	21	Jan Kochanowski University Of Kielce Institute Of Chemistry	13	INDUSTRIAL ENGINEERING CHEMISTRY RESEARCH	12			RUSSIA	38	Natl Inst Optoelectronics	6	Environmental Sciences Ecology	24			ENGINEERING PHYSICAL SCIENCES RESEARCH COUNCIL EPSRC	7	10TH INTERNATIONAL SYMPOSIUM ON THE CHARACTERIZATION OF POROUS SOLIDS	1			Uskokovic DP	1
2016	40			Wang, Qiang	19	Physics Applied	29	3.87 Biobased Materials & Bioenergy	10	2.90.930 Montmorillonite	11					UNIVERSITY OF OVIEDO	21	Çanakkale Onsekiz Mart University Faculty Of Sciences And Arts	12	INTERNATIONAL JOURNAL OF PHARMACEUTICS	12			CANADA	34	Sage	6	Metallurgy Metallurgical Engineering	19			NATIONAL SCIENCE CENTRE POLAND	7	10TH POLISH UKRAINIAN SYMPOSIUM ON THEORETICAL AND EXPERIMENTAL STUDIES OF INTERFACIAL PHENOMENA AND THEIR TECHNOLOGICAL APPLICATIONS	1			Waugh KC	1
2015	34			Karaman, Ferdane	19	Pharmacology Pharmacy	27	2.176 Drug Delivery Chemistry	9	2.41.25 Catalytic Oxidation	9					MAASTRICHT UNIVERSITY	20	Imperial College London Faculty Of Engineering	11	JOURNAL OF CHEMICAL AND ENGINEERING DATA	12			NETHERLANDS	33	Vieweg	6	Mechanics	15			CZECH SCIENCE FOUNDATION	6	11TH EUROPEAN CONF ON THE CHEMISTRY OF INTERFACES	1			Zilkova N	1
2014	23			Vega, Aurelio	18	Physics Atomic Molecular Chemical	25	3.60 Herbicides, Pesticides & Ground Poisoning	8	2.89.72 Vapor-liquid Equilibria	8					FIRAT UNIVERSITY	19	Palacky University Olomouc Faculty Of Science	11	JOURNAL OF CHEMICAL THERMODYNAMICS	12			LEBANON	27	Amer Chemical Soc Inc	5	Mineralogy	14			MINISTRY OF EDUCATION YOUTH SPORTS CZECH REPUBLIC	6	11TH EUROPEAN CONFERENCE ON APPLICATIONS OF SURFACE AND INTERFACE ANALYSIS	1
2013	26			Bandosz, Teresa J	17	Physics Condensed Matter	25	2.160 Microfluidic Devices & Superhydrophobicity	7	3.87.269 Cellulose Composites	8					ESKISEHIR OSMANGAZI UNIVERSITY	17	University Of Science And Technology Houari Boumediene Faculty Of Chemistry	11	JOURNAL OF PHYSICAL CHEMISTRY C	12			SOUTH KOREA	27	PLEIADES PUBLISHING LTD	5	Food Science Technology	13			NATURAL SCIENCES AND ENGINEERING RESEARCH COUNCIL OF CANADA NSERC	6	11TH INTERNATIONAL SYMPOSIUM ON PREPARATIVE AND INDUSTRIAL CHROMATOGRAPHY AND ALLIED TECHNIQUES	1
2012	32			Kaya, İsmet	16	Environmental Sciences	24	7.109 Ceramics	7	2.160.365 Superhydrophobic	7					POZNAN UNIVERSITY OF TECHNOLOGY	17	Warsaw University Of Technology Faculty Of Chemistry	11	ADSORPTION SCIENCE TECHNOLOGY	11			ALGERIA	20	Chem Soc Pakistan	4	Energy Fuels	12			RUSSIAN FOUNDATION FOR BASIC RESEARCH RFBR	6	11TH POLISH UKRAINIAN SYMPOSIUM ON THEORETICAL AND EXPERIMENTAL STUDIES OF INTERFACIAL PHENOMENA AND THEIR TECHNOLOGICAL APPLICATIONS	1
2011	31			Voelkel, Adam	16	Engineering Environmental	23	2.234 Photochemistry	6	2.89.1445 Distillation Process Optimization	7					UNIVERSITE DE LORRAINE	17	Imperial College London Department Of Chemical Engineering	10	CARBON	11			MEXICO	19	FRIEDR VIEWEG SOHN VERLAG GMBH	4	Instruments Instrumentation	12			UNIVERSITY GRANTS COMMISSION INDIA	6	15TH FOOD COLLOIDS CONFERENCE	1
2010	23			yazici, osman	16	Metallurgy Metallurgical Engineering	19	7.139 Energy & Fuels	6	2.234.78 Liquid Crystals	6					COMMUNAUTE D UNIVERSITES ET ETABLISSEMENTS DE TOULOUSE COMUE	16	Regional Centre Of Advanced Technologies And Materials	10	EUROPEAN POLYMER JOURNAL	11			INDIA	18	Korean Institute Chemical Engineers	4	Agriculture	10			JUNTA DE ANDALUCIA	5	17TH INTERNATIONAL CONFERENCE FOR CHEMICAL THERMODYNAMICS	1
2009	32			IŞIK, Birol	15	Materials Science Coatings Films	18	2.114 Organic Semiconductors	5	7.109.308 Ceramic Matrix Composites	6					UNIVERSITE DE TOULOUSE EPE	16	Warsaw University Of Technology Department Of Physical Chemistry	10	JOURNAL OF POLYMER SCIENCE PART B POLYMER PHYSICS	11			JAPAN	18	MULTI SCIENCE PUBL CO LTD	4	Crystallography	10			NATIONAL SCIENCE FOUNDATION NSF	5	18TH INTERNATIONAL CONF IN ORGANIC COATINGS SCIENCE AND TECHNOLOGY	1
2008	30			Calvet, Rachel	15	Mechanics	15	2.165 Nanofibers, Scaffolds & Fabrication	4	2.114.199 Conductive Polymers	5					IMT INSTITUT MINES TELECOM	15	The Pennsylvania State University College Of Engineering	9	MACROMOLECULES	11			PORTUGAL	18	Oxford Univ Press	4	Biophysics	8			TURKIYE BILIMSEL VE TEKNOLOJIK ARASTIRMA KURUMU TUBITAK	5	1ST FRANCO ALGERIEN CONFERENCE ON CHROMATOGRAPHY	1
2007	29			Papirer, E	14	Materials Science Paper Wood	14	2.170 Nucleic Acids Chemistry	4	2.41.1712 Layered Double Hydroxides	5					IMT MINES ALBI	15	The Pennsylvania State University Department Of Chemical Engineering	9	CHEMICAL ENGINEERING JOURNAL	10			CZECH REPUBLIC	14	CLAY MINERALS SOCIETY	3	Optics	6			FUNDACAO PARA A CIENCIA E A TECNOLOGIA FCT	4	1ST INTERNATIONAL MEETING ON APPLIED PHYSICS	1
2006	33			Chehimi, Mohamed Mehdi	14	Mineralogy	14	3.85 Food Science & Technology	4	2.76.39 Graphene	5					PENNSYLVANIA COMMONWEALTH SYSTEM OF HIGHER EDUCATION PCSHE	15	Tsinghua University Department Of Chemical Engineering	8	JOURNAL OF ADHESION SCIENCE AND TECHNOLOGY	10			SWITZERLAND	14	E D P Sciences	3	Geology	5			GERMAN RESEARCH FOUNDATION DFG	4	1ST POLISH UKRAINIAN SYMPOSIUM ON THEORETICAL AND EXPERIMENTAL STUDIES OF INTERFACIAL PHENOMENA AND THEIR TECHNOLOGICAL APPLICATION	1
2005	36			Sakar Dasdan, Dolunay	13	Food Science Technology	13	3.87 Paper & Wood Materials Science	4	2.89.1445 Reactive Distillation	5					PENNSYLVANIA STATE UNIVERSITY	15	University Of Bradford Faculty Of Life Sciences	8	INSTRUMENTATION SCIENCE TECHNOLOGY	9			AUSTRALIA	12	FEDERATION SOC COATING TECH	3	Mining Mineral Processing	4			MINISTRY OF EDUCATION AND SCIENCE RUSSIAN FEDERATION	4	23RD ANNUAL MEETING OF THE ADHESION SOCIETY	1
2004	33			Kudasheva, F. Kh.	13	Energy Fuels	12	7.229 Mineral & Metal Processing	4	2.170.1483 Origin Of Life	4					RUSSIAN ACADEMY OF SCIENCES	15	University Of Bradford School Of Pharmacy And Medical Sciences	8	SURFACE AND INTERFACE ANALYSIS	9			CUBA	11	Freund Publishing House Ltd	3	Biotechnology Applied Microbiology	3			MINISTRY OF EDUCATION CHINA 111 PROJECT	4	24TH INTERNATIONAL SYMPOSIUM ON CHROMATOGRAPHY	1
2003	19			Balard, H.	13	Instruments Instrumentation	12	7.70 Thermodynamics	4	2.176.140 Oral Delivery	4					ANADOLU UNIVERSITY	14	Nanjing University School Of The Environment	6	APPLIED SURFACE SCIENCE	8			ITALY	10	Hindawi Publishing Group	3	Construction Building Technology	2			OPENING FOUNDATION OF KEY LABORATORY OF XINJIANG UYGUR AUTONOMOUS REGION	4	29TH CONFERENCE ON THE STUDY OF BALANCES BETWEEN PHASES	1
2002	44			Coca, John Jaime Perez	12	Biochemistry Molecular Biology	11	8.140 Water Resources	4	2.39.540 Flame Retardant Polymers	4					CANAKKALE ONSEKIZ MART UNIVERSITY	14	University Of Alberta Department Of Chemical And Materials Engineering	6	JOURNAL OF PHYSICAL CHEMISTRY B	8			SAUDI ARABIA	10	Japan Inst Metals	3	Electrochemistry	2			PALACKY UNIVERSITY	4	29TH INTERNATIONAL SYMPOSIUM ON CHROMATOGRAPHY	1
2001	29			Otyepkova, E	11	Crystallography	10	1.117 Pharmacology & Toxicology	2	7.229.1157 Flotation	4					PENNSYLVANIA STATE UNIVERSITY UNIVERSITY PARK	14	University Of Alberta Faculty Of Engineering	6	POLYMER	8			BELGIUM	9	Serbian Chemical Soc	3	Forestry	2			SCIENCE TECHNOLOGY COMMISSION OF SHANGHAI MUNICIPALITY STCSM	4	2ND INTERNATIONAL CONGRESS ON CATALYSIS FOR BIOREFINERIES CATBIOR	1
2000	23			Milonjic, Slobodan	11	Materials Science Textiles	9	2.59 Pigments, Sensors & Probes	2	7.70.1455 Liquid Desiccant	4					UNIVERSITE PARIS CITE	14	Fudan University Department Of Chemistry	5	JOURNAL OF MATERIALS SCIENCE	7			TURKIYE	9	Tubitak Scientific & Technological Research Council Turkey	3	Mathematics	2			UNITED STATES DEPARTMENT OF DEFENSE	4	2ND INTERNATIONAL TRI PRINCETON WORKSHOP ON CHARACTERIZATION OF POROUS MATERIALS	1
1999	21			Grajek, Henryk	11	Biophysics	8	3.180 Microbial Biotechnology	2	2.22.1495 Spin Crossover	3					UNIVERSITY OF BELGRADE	14	Jeonbuk National University College Of Engineering	5	MATERIALS	7			BRAZIL	8	Vsp Bv	3	Meteorology Atmospheric Sciences	2			UNITED STATES DEPARTMENT OF ENERGY DOE	4	2ND YUGOSLAV CONFERENCE ON ADVANCED MATERIALS YUGOMAT II	1
1998	23			Jagiello, Jacek	11	Materials Science Ceramics	7	3.220 Smell & Taste Science	2	2.39.433 Polymer Crystallization	3					JAN KOCHANOWSKI UNIVERSITY	13	Jeonbuk National University Department Of Mineral Resources And Energy Engineering	5	RUSSIAN CHEMICAL BULLETIN	7			UKRAINE	8	Asian Journal Of Chemistry	2	Automation Control Systems	1			COMUNIDAD DE MADRID	3	30TH EUROPEAN SYMPOSIUM ON APPLIED THERMODYNAMICS ESAT	1
1997	23			MUTELET, Fabrice	10	Materials Science Composites	7	7.121 Concrete Science	2	2.76.23 Carbon Nanotubes	3					INSTITUTO POLITECNICO NACIONAL MEXICO	12	King Saud University College Of Science	5	RUSSIAN JOURNAL OF PHYSICAL CHEMISTRY A	7			SLOVAKIA	7	Bentham Science Publ Ltd	2	Computer Science	1			CONSELHO NACIONAL DE DESENVOLVIMENTO CIENTIFICO E TECNOLOGICO CNPQ	3	31ST IBERIC ADSORPTION MEETING	1
1996	14			SCHWARZ, JA	10	Optics	6	8.124 Environmental Sciences	2	3.180.293 Lipase	3					MILITARY UNIVERSITY OF TECHNOLOGY IN WARSAW	12	University Of Coimbra Department Of Chemical Engineering	5	APPLIED CLAY SCIENCE	6			YUGOSLAVIA	7	Bulgarian Acad Science	2	Geochemistry Geophysics	1			FUNDAMENTAL RESEARCH FUNDS FOR THE CENTRAL UNIVERSITIES	3	3RD CHINA EUROPE SYMPOSIUM ON PROCESSING AND PROPERTIES OF REINFORCED POLYMERS	1
1995	18			İLTER, ZÜLFİYE	10	Geosciences Multidisciplinary	5	1.132 Extracellular Matrix & Cell Differentiation	1	3.60.1654 Phthalates	3					UNIVERSITY SCIENCE TECHNOLOGY HOUARI BOUMEDIENE	12	University Of Coimbra Faculty Of Sciences And Technology	5	KOREAN JOURNAL OF CHEMICAL ENGINEERING	6			HUNGARY	5	CONSULTANTS BUREAU	2	Nuclear Science Technology	1			FWO	3	3RD CONFERENCE OF THE FEDERATION OF EUROPEAN ZEOLITE ASSOCIATION	1
1994	21			askin, aysegul	10	Green Sustainable Science Technology	5	1.68 Lipids	1	7.139.89 Gasification	3					AGH UNIVERSITY OF KRAKOW	11	Fudan University Department Of Macromolecular Science	4	MOLECULES	6			MALAYSIA	5	Editura Acad Romane	2	Nutrition Dietetics	1			GENERAL SECRETARIAT FOR RESEARCH TECHNOLOGY	3	3RD INTERNATIONAL CONFERENCE ON OIL AND POLLUTION	1
1993	21			Onjia, Antonije	10	Multidisciplinary Sciences	5	2.145 Biosensors	1	8.140.1260 Asphaltenes	3					CNRS INSTITUTE OF CHEMISTRY INC	11	Fudan University Department Of Material Science	4	OPTOELECTRONICS AND ADVANCED MATERIALS RAPID COMMUNICATIONS	6			BANGLADESH	4	KLUWER ACADEMIC PUBL	2	Plant Sciences	1			JAPAN SOCIETY FOR THE PROMOTION OF SCIENCE	3	3RD INTERNATIONAL SYMPOSIUM ON CALORIMETRY AND THERMAL EFFECTS IN CATALYSIS	1
1992	9			Hamdi, Boualem	10	Soil Science	5	2.167 Microelectromechanical Systems	1	1.117.1000 Volatile Organic Compounds	2					IMPERIAL COLLEGE LONDON	11	Gdańsk University Of Technology Faculty Of Chemistry	4	PHYSICAL CHEMISTRY CHEMICAL PHYSICS	6			EGYPT	4	KOREAN INST CHEM ENGINEERS	2	Public Environmental Occupational Health	1			MINISTRY OF EDUCATION CULTURE SPORTS SCIENCE AND TECHNOLOGY JAPAN MEXT	3	44TH INTERNATIONAL CONFERENCE OF SLOVAK SOCIETY OF CHEMICAL ENGINEERING SSCHE	1
1991	12			Ocak Gümrükçü, Hale	10	Agricultural Engineering	4	2.190 Surfactants, Lipid Bilayers & Antimicrobial Peptides	1	2.165.163 Hydroxyapatite Composites	2					PALACKY UNIVERSITY OLOMOUC	11	Istanbul Technical University Department Of Chemistry	4	POWDER TECHNOLOGY	6			IRAN	4	NATURE PORTFOLIO	2	Water Resources	1			MINISTRY OF EDUCATION MOE REPUBLIC OF KOREA	3	4TH ANNUAL UNESCO SCHOOL AND IUPAC CONFERENCE ON MACROMOLECULES AND MATERIALS SCIENCE	1
1990	2			Danner, Ronald P.	10	Chemistry Inorganic Nuclear	4	2.210 Corrosion & Deposition Chemistry	1	2.165.844 Electrospinning	2					STATE UNIVERSITY OF NEW YORK SUNY SYSTEM	11	Istanbul Technical University Faculty Of Science And Letters	4	PROTECTION OF METALS AND PHYSICAL CHEMISTRY OF SURFACES	6			SERBIA	4	SCIENTIFIC TECHNICAL RESEARCH COUNCIL TURKEY	2					MINISTRY OF SCIENCE AND HIGHER EDUCATION	3	4TH FRENCH MEETING ON POWDER SCIENCE AND TECHNOLOGY	1
1989	1			Rodriguez-Castellon, Enrique	9	Chemistry Medicinal	4	2.62 Electrochemistry	1	2.166.1659 Biosimilars	2					SYRACUSE UNIVERSITY	11	King Abdullah University Of Science And Technology Physical Sciences And Engineering Division	4	ACS SUSTAINABLE CHEMISTRY ENGINEERING	5			SWEDEN	4	Soc Wood Sci Technol	2					MINISTRY OF TRADE INDUSTRY ENERGY MOTIE REPUBLIC OF KOREA	3	4TH INTERNATIONAL SYMPOSIUM ON SPRAY DRIED DAIRY PRODUCTS	1
1986	2			Kapolos, John	9	Chemistry Organic	4	2.74 Photocatalysts	1	2.176.1649 Dry Powder Inhaler	2					WARSAW UNIVERSITY OF TECHNOLOGY	11	King Saud University Department Of Chemistry	4	CELLULOSE	5			TAIWAN	4	Amer Industrial Hygiene Assoc	1					NETHERLANDS ORGANIZATION FOR SCIENTIFIC RESEARCH NWO	3	4TH INTERNATIONAL SYMPOSIUM ON STRUCTURE AND REACTIVITY OF CARBONACEOUS MATERIALS COAL STRUCTURE 2002	1
1983	1			Agelakopoulou, T.	9	Engineering Multidisciplinary	4	2.78 Photoluminescence	1	2.176.878 Pharmaceutical Crystal Engineering	2					ARISTOTLE UNIVERSITY OF THESSALONIKI	10	Kyushu University International Institute For Carbon Neutral Energy Research	4	ENERGY FUELS	5			FINLAND	3	Amer Inst Chemical Engineers	1					NORWEGIAN AGENCY FOR DEVELOPMENT COOPERATION NORAD	3	5TH ANNUAL UNESCO SCHOOL AND IUPAC CONFERENCE ON MACROMOLECULES AND MATERIALS SCIENCE	1
1982	2			Donnet, J	9	Mining Mineral Processing	4	3.180 Enzyme Biotechnology	1	2.53.1451 Dendrimers	2					CNRS INSTITUTE FOR ENGINEERING SYSTEMS SCIENCES INSIS	10	Polytechnique Montreal Department Of Chemical Engineering	4	JOURNAL OF CHROMATOGRAPHY	5			SERBIA MONTENEG	3	Amer Inst Physics	1					ROYAL SOCIETY UK	3	5TH INTERNATIONAL CONF ON MAGNETIC RECORDING MEDIA MRM 92	1
1981	1			Schreiber, HP	9	Biotechnology Applied Microbiology	3	3.4 Crop Science	1	2.53.704 Polymer Dynamics	2					POLYTECHNIQUE MONTREAL	10	State Key Laboratory Of Molecular Engineering Of Polymers	4	JOURNAL OF MEMBRANE SCIENCE	5			SOUTH AFRICA	3	Asce-Amer Soc Civil Engineers	1					WARSAW UNIVERSITY OF TECHNOLOGY	3	5TH INTERNATIONAL CONFERENCE ON INTERFACIAL PHENOMENA IN COMPOSITE MATERIALS	1
1980	1			Slomkiewicz, Piotr	9	Agronomy	2	3.45 Soil Science	1	2.53.884 Block Copolymers	2					UNIVERSIDAD DE MALAGA	10	Tianjin University School Of Chemical Engineering And Technology	4	KAUTSCHUK GUMMI KUNSTSTOFFE	5			WALES	3	Brazilian Soc Chemical Eng	1					WORLD GOLD COUNCIL	3	6TH INTERNATIONAL FLOTATION CONFERENCE FLOTATION	1
				Chen, Yali	9	Construction Building Technology	2	5.188 Deposition, Hardening & Coating	1	3.60.812 Pesticide Degradation	2					UNIVERSITE DE MONTREAL	10	University Of Washington College Of Engineering	4	POLYMER INTERNATIONAL	5			ARGENTINA	2	Brill Academic Publishers	1					XINJIANG UNIVERSITY	3	6TH INTERNATIONAL SYMPOSIUM ON CHARACTERIZATION OF POROUS SOLIDS COPS VI	1
				Ramanaiah, S.	8	Electrochemistry	2	5.30 Superconductor Science	1	3.85.99 Cereal Starch Properties	2					FUDAN UNIVERSITY	9	University Of Washington Department Of Chemical Engineering	4	POLYMER PLASTICS TECHNOLOGY AND ENGINEERING	5			AUSTRIA	2	Butterworth-Heinemann Ltd	1					3RD PRI ASTURIAS	2	6TH INTERNATIONAL SYMPOSIUM ON EFFECTS OF SURFACE HETEROGENEITY IN ADSORPTION AND CATALYSIS ON SOLIDS	1
				Koliadima, Athanasia	8	Forestry	2	7.227 Precision Manufacturing	1	3.87.1003 Lignin Valorization	2					SRI VENKATESWARA UNIVERSITY	9	Vub Department Of Bioengineering Sciences	4	RUBBER CHEMISTRY AND TECHNOLOGY	5			NORWAY	2	Carl Hanser Verlag	1					AUSTRALIAN GOVERNMENT	2	6TH INTERNATIONAL SYMPOSIUM ON NANOPOROUS MATERIALS	1
				Tang, Jun	8	Mathematics Interdisciplinary Applications	2	7.260 Nuclear Engineering	1	3.87.150 Lignocellulosic Bioconversion	2					UNIVERSITY OF IOANNINA	9	Vub Faculty Of Sciences And Bio Engineering Sciences	4	SEPARATION SCIENCE AND TECHNOLOGY	5			TUNISIA	2	EUROPEAN POLYMER FEDERATION	1					CANADA FOUNDATION FOR INNOVATION	2	7TH ANNUAL MEETING ON CONDUCTOR POLYMERS JPC 97	1
				Rubio, Juan	8	Meteorology Atmospheric Sciences	2	7.262 Explosives	1	3.87.527 Wood Properties	2					NATIONAL ACADEMY OF SCIENCES UKRAINE	8	Vub Research Group Chemical Engineering	4	TURKISH JOURNAL OF CHEMISTRY	5			ALBANIA	1	Editura Academiei Romane	1					COOPERATIVE RESEARCH CENTRES CRC PROGRAMME	2	7TH INTERNATIONAL FLOTATION CONFERENCE FLOTATION	1
				Otyepka, Michal	8	Agriculture Multidisciplinary	1	7.300 Asphalt	1	7.121.26 Advanced Concrete	2					TSINGHUA UNIVERSITY	8	American University Of Beirut Department Of Chemistry	3	ADSORPTION JOURNAL OF THE INTERNATIONAL ADSORPTION SOCIETY	4			BELARUS	1	Edp Sciences S A	1					COORDENACAO DE APERFEICOAMENTO DE PESSOAL DE NIVEL SUPERIOR CAPES	2	7TH INTERNATIONAL SYMPOSIUM ON EFFECTS OF SURFACE HETEROGENEITY IN ADSORPTION AND CATALYSIS ON SOLIDS	1
				Metaxa, Eleni	8	Automation Control Systems	1			7.139.835 Co2 Capture	2					UNITED STATES DEPARTMENT OF ENERGY DOE	8	American University Of Beirut Faculty Of Arts And Sciences	3	CARBOHYDRATE POLYMERS	4			BULGARIA	1	Frontiers Media Sa	1					COREM	2	8TH DANUBE SYMP ON CHROMATOGRAPHY	1
				Basivi, Dr. Praveen kumar	8	Computer Science Artificial Intelligence	1			1.132.816 Glycosaminoglycans	1					UNIVERSIDAD DE LA HABANA	8	Deakin University Institute For Frontier Materials Ifm	3	CLAYS AND CLAY MINERALS	4			DENMARK	1	Global Network Environmental Science & Technology	1					COUNCIL OF SCIENTIFIC INDUSTRIAL RESEARCH CSIR INDIA	2	8TH INTERNATIONAL CONFERENCE ON PROPERTIES AND PHASE EQUILIBRIA FOR PRODUCT AND PROCESS DESIGN	1
				Witkiewicz, Zygfryd	8	Engineering Civil	1			1.68.1758 Fat Crystallization	1					UNIVERSITY OF BRADFORD	8	Firat University Faculty Of Science	3	ENVIRONMENTAL SCIENCE TECHNOLOGY	4			INDONESIA	1	Hosokawa Powder Technol Foundation	1					DEFENSE THREAT REDUCTION AGENCY	2	8TH INTERNATIONAL CONFERENCE ON PROTECTION AND RESTORATION OF THE ENVIRONMENT	1
				Bassiotis, I.	8	Engineering Manufacturing	1			2.145.1518 Molecular Imprinting	1					CENTRE DE RECHERCHE SCIENTIFIQUE ET TECHNIQUE EN ANALYSES PHYSICO CHIMIQUES	7	Fudan University Department Of Mechanics And Engineering Science	3	INTERNATIONAL JOURNAL OF POLYMER ANALYSIS AND CHARACTERIZATION	4			IRELAND	1	I O M Communications Ltd Inst Materials	1					DEPARTMENT OF INDUSTRY INNOVATION AND SCIENCE	2	9TH INTERNATIONAL CONFERENCE ON FUNDAMENTALS OF ADSORPTION FOA9	1
				Abel, M-L	7	Engineering Mechanical	1			2.167.555 Atomic Force Microscopy	1					CITY COLLEGE OF NEW YORK CUNY	7	Fudan University School Of Microelectronics	3	JOURNAL OF CHROMATOGRAPHIC SCIENCE	4			ISRAEL	1	INSTYTUT CHEMII FIZYCZNEJ PAN	1					DEPARTMENT OF SCIENCE TECHNOLOGY INDIA	2	9TH INTERNATIONAL CONFERENCE ON PROPERTIES AND PHASE EQUILIBRIA FOR PRODUCT AND PROCESS DESIGN	1
				Marciniak, Andrzej	7	Geochemistry Geophysics	1			2.176.878 Cocrystals	1					CITY UNIVERSITY OF NEW YORK CUNY SYSTEM	7	Fudan University State Key Laboratory Of Asic And System	3	JOURNAL OF HAZARDOUS MATERIALS	4			LIBYA	1	Industrial Chemistry Research Inst	1					DUTCH RESEARCH COUNCIL NWO START UP	2	9TH INTERNATIONAL CONFERENCE ON SURFACE AND COLLOID SCIENCE 9ICSCS	1
				Siokos, Vasileios	7	Materials Science Biomaterials	1			2.190.215 Critical Micelle Concentration	1					CSIC INSTITUTO DE CERAMICA Y VIDRIO ICV	7	Gdansk University Of Technology Department Of Inorganic Chemistry	3	JOURNAL OF MACROMOLECULAR SCIENCE PART B PHYSICS	4			NEW ZEALAND	1	Iop Publishing Ltd	1					EUROPEAN RESEARCH COUNCIL ERC	2	CLAY AND FINE PARTICLE BASED MATERIALS FOR ENVIRONMENTAL TECHNOLOGIES AND CLEAN UP SESSION AT THE EUROCLAY CONFERENCE	1
				Montes-Moran, Miguel A.	7	Nuclear Science Technology	1			2.210.137 Corrosion Inhibition	1					SLOVAK ACADEMY OF SCIENCES	7	Inha University College Of Natural Sciences	3	JOURNAL OF MATERIALS CHEMISTRY	4			NIGERIA	1	Iwa Publishing	1					FIRAT UNIVERSITY	2	CONFERENCE ON INTERFACES AND INTERPHASES IN MULTICOMPONENT MATERIALS	1
				Reguera, Edilso	7	Nutrition Dietetics	1			2.241.270 Nanofiltration	1					SURFACE MEASUREMENT SYST LTD	7	Inha University Department Of Chemistry	3	JOURNAL OF POLYMER ENGINEERING	4			NORTH IRELAND	1	KING FAHD UNIV PETROLEUM MINERALS	1					FLOTTEC	2	CONFERENCE ON POLYMERS IN THE 3RD MILLENNIUM	1
				YAZICI, DEMET TOPALOĞLU	7	Physics Multidisciplinary	1			2.39.712 Glass Transition	1					SWISS FEDERAL INSTITUTES OF TECHNOLOGY DOMAIN	7	Izmir Institute Of Technology Department Of Chemical Engineering	3	JOURNAL OF POLYMER RESEARCH	4			ROMANIA	1	Kluwer Academic/Plenum Publ	1					FOUNDATION FOR THE SCIENCE AND TECHNOLOGY	2	EUROFILLERS 2003 CONFERENCE	1
				Putyera, Karol	7	Plant Sciences	1			2.39.903 Polyimides	1					UNIVERSITY OF ALBERTA	7	Izmir Institute Of Technology Faculty Of Engineering	3	JOURNAL OF SOL GEL SCIENCE AND TECHNOLOGY	4			SINGAPORE	1	Korean Fiber Soc	1					FRENCH MINISTRY OF NATIONAL EDUCATION HIGHER EDUCATION AND RESEARCH	2	INTERNATIONAL CONFERENCE ON INTERFACES AGAINST POLLUTION	1
				Reddy, K. Siddarth	7	Public Environmental Occupational Health	1			2.41.1267 Desulfurization Catalysts	1					UNIVERSITY OF BASQUE COUNTRY	7	Pukyong National University College Of Engineering	3	JOURNAL OF THE CHEMICAL SOCIETY OF PAKISTAN	4			SLOVENIA	1	Korean Society Food Science & Technology-Kosfost	1					FUDAN S UNDERGRADUATE RESEARCH OPPORTUNITIES PROGRAM FDUROP	2	INTERNATIONAL SYMPOSIUM ON PREPARATIVE AND INDUSTRIAL CHROMATOGRAPHY AND ALLIED TECHNIQUES	1
				Acikses, A	7	Statistics Probability	1			2.41.366 Selective Catalytic Reduction	1					UNIVERSITY OF LEEDS	7	Pukyong National University Department Of Nanotechnology Engineering	3	LIQUID CRYSTALS	4			U ARAB EMIRATES	1	MINERALOGICAL SOCIETY	1					FUNDACAO DE AMPARO A PESQUISA DO ESTADO DE SAO PAULO FAPESP	2	INTERNATIONAL SYMPOSIUM ON REACTION KINETICS AND THE DEVELOPMENT OF CATALYTIC PROCESSES	1
				Martinez Alonso, Amelia	7	Water Resources	1			2.41.546 Catalytic Hydrogenation	1					YUZUNCU YIL UNIVERSITY	7	The Pennsylvania State University College Of Earth And Mineral Sciences	3	MACROMOLECULAR SYMPOSIA	4			USSR	1	Multi-Science Publ Co Ltd	1					GOVT OF INDIA NEW DELHI	2	INTERNATIONAL SYMPOSIUM ON THE INTERPHASE AT THE 16TH ANNUAL MEETING OF THE ADHESION SOCIETY INCORPORATED	1
				M. Wlazlo	7					2.53.1268 Polymer Coatings	1					CHINESE ACADEMY OF SCIENCES	6	The Pennsylvania State University Department Of Chemistry	3	POLYMER BULLETIN	4			VENEZUELA	1	North Carolina State Univ Dept Wood & Paper Sci	1					GRANTS IN AID FOR SCIENTIFIC RESEARCH KAKENHI	2	SYMPOSIUM ON POWDER SCIENCE AND TECHNOLOGY POWDERS AND SINTERED MATERIAL	1
				York, P	7					2.53.2046 Pickering Emulsions	1					FAHRENHEIT UNIVERSITIES	6	The Pennsylvania State University Department Of Materials Science And Engineering	3	RSC ADVANCES	4			ZIMBABWE	1	Oficyna Wydawnicza Politechniki Wroclawskiej	1					GREEK NATIONAL FUNDS THROUGH THE OPERATIONAL PROGRAM EDUCATION AND LIFELONG LEARNING OF THE NATIONAL STRATEGIC REFERENCE FRAMEWORK NSRF RESEARCH FUNDING PROGRAM ARCHIMEDES III	2
				Castro, Giselle Ileana Autié	7					2.53.266 Advanced Polymerization	1					GDANSK UNIVERSITY OF TECHNOLOGY	6	The Pennsylvania State University Eberly College Of Science	3	SEPARATION AND PURIFICATION TECHNOLOGY	4					POLISH CHEMICAL SOCIETY	1					HORIZON 2020	2
				Lazar, Petr	7					2.53.459 Polymer Surface Modification	1					INHA UNIVERSITY	6	Tsinghua University State Key Laboratory Of Chemical Engineering	3	SURFACES AND INTERFACES	4					POLYMER RESEARCH CENTER IRAN	1					HUNGARIAN STATE	2
				Demertzis, Panagiotis	7					2.59.250 Cyclodextrins	1					INSTITUTE OF INORGANIC CHEMISTRY SAS	6	University Of Alberta Department Of Civil And Environmental Engineering	3	APPLIED SCIENCES BASEL	3					Parlar Scientific Publications (P S P)	1					INSTITUTO DE CIENCIA Y TECNOLOGIA DEL DISTRITO FEDERAL ICYTDF	2
				Tascon, Juan M. D. M. D.	7					2.59.890 Esipt	1					INSTITUTO DE CIENCIA TECNOLOGIA DEL CARBONO INCAR CSIC	6	University Of Belgrade Faculty Of Technology And Metallurgy	3	CATALYSIS TODAY	3					Pleiades Publishing Inc	1					KEY LABORATORY OF OIL AND GAS FINE CHEMICALS MINISTRY OF EDUCATION AND XINJIANG UIGHUR AUTONOMOUS REGION XINJIANG UNIVERSITY	2
				Loukopoulos, V. C.	6					2.62.2102 Co2 Electroreduction	1					KING SAUD UNIVERSITY	6	University Of Coimbra Chemical Process Engineering And Forest Products Research Centre	3	CRYSTALS	3					Polish Chemical Soc	1					KING ABDULAZIZ CITY FOR SCIENCE TECHNOLOGY	2
				Boudriche, Lilya	6					2.74.5 Tio2 Photocatalysis	1					NANJING UNIVERSITY	6	University Of Genoa Department Of Chemistry And Industrial Chemistry	3	EUROPEAN JOURNAL OF PHARMACEUTICAL SCIENCES	3					Polska Akad Nauk	1					KING SAUD UNIVERSITY	2
				DEMİRELLİ, KADİR	6					2.76.2087 Graphite Intercalation Compounds	1					ADSCIENTIS	5	University Of Genoa School Of Mathematical Physical And Natural Sciences	3	INTERNATIONAL JOURNAL OF ADHESION AND ADHESIVES	3					R Oldenbourg Verlag	1					LEBANESE UNIVERSITY	2
				Toufaily, Joumana	6					2.76.544 2d Material Properties	1					ASTRAZENECA	5	University Of Malaya Department Of Chemistry	3	JOURNAL DE CHIMIE PHYSIQUE ET DE PHYSICO CHIMIE BIOLOGIQUE	3					SPRINGER INT PUBL AG	1					MINISTRY OF ECONOMY AND COMPETITIVENESS	2
				Thielmann, Frank	6					2.78.404 Glasses	1					BENEMERITA UNIVERSIDAD AUTONOMA DE PUEBLA	5	University Of Malaya Faculty Of Science	3	JOURNAL OF COATINGS TECHNOLOGY	3					Trans Tech Publications Ltd	1					MINISTRY OF EDUCATION SCIENCE TECHNOLOGICAL DEVELOPMENT SERBIA	2
				bilgiç, ceyda	6					2.89.1121 Supercritical Carbon Dioxide	1					CHUIKO INSTITUTE OF SURFACE CHEMISTRY OF NASU	5	Aston University College Of Engineering And Physical Sciences	2	JOURNAL OF PHARMACEUTICAL SCIENCES	3					Univ Kebangsaan Malaysia	1					MINISTRY OF SCIENCE AND HIGHER EDUCATION POLAND	2
				Uğraşkan, Volkan	6					2.89.462 Excess Molar Volumes	1					HUBEI UNIVERSITY	5	Aston University School Of Engineering And Technology	2	JOURNAL OF SEPARATION SCIENCE	3					Walter De Gruyter	1					MINISTRY OF SCIENCE ICT MSIT REPUBLIC OF KOREA	2
				Guthrie, JD	6					2.90.1332 Goethite	1					JEONBUK NATIONAL UNIVERSITY	5	Cardiff University College Of Physical Sciences And Engineering	2	JOURNAL OF THE SERBIAN CHEMICAL SOCIETY	3					Walter de Gruyter	1					NATIONAL BASIC RESEARCH PROGRAM OF CHINA	2
				Kim, Joon Yeong	6					3.220.1595 Electronic Nose	1					MARIA CURIE SKLODOWSKA UNIVERSITY	5	Cardiff University School Of Chemistry	2	JOURNAL OF WOOD CHEMISTRY AND TECHNOLOGY	3											NATIONAL HIGH TECHNOLOGY RESEARCH AND DEVELOPMENT PROGRAM OF CHINA	2
				Luner, P	6					3.220.701 Olfactory Systems	1					MCGILL UNIVERSITY	5	Dongguk University College Of Engineering	2	MATERIALS CHEMISTRY AND PHYSICS	3											NATIONAL RESOURCES	2
				Long, Chao	6					3.4.413 Postharvest Fruit Quality	1					TOPCHIEV INSTITUTE OF PETROCHEMICAL SYNTHESIS RAS	5	Dongguk University Department Of Mechanical Robotics And Energy Engineering	2	MATERIALS TRANSACTIONS	3											NATIONAL SCIENCE TECHNOLOGY COUNCIL NSTC TAIWAN	2
				Panayiotou, C.	6					3.45.879 Soil Erosion	1					UNIVERSIDADE DE COIMBRA	5	Gdańsk University Of Technology Faculty Of Civil And Environmental Engineering	2	NEW JOURNAL OF CHEMISTRY	3											NATURAL SCIENCE FOUNDATION OF HEILONGJIANG PROVINCE	2
				Strzemiecka, Beata	6					3.60.1998 Pfas Impact	1					UNIVERSITE GUSTAVE EIFFEL	5	Iowa State University College Of Liberal Arts And Sciences	2	PHARMACEUTICAL RESEARCH	3											PRIORITY ACADEMIC PROGRAM DEVELOPMENT OF JIANGSU HIGHER EDUCATION INSTITUTIONS PAPD	2
				Duda, J	6					3.60.221 Persistent Organic Pollutants	1					UNIVERSITY AT BUFFALO SUNY	5	Iowa State University Department Of Chemistry	2	POLYMERS	3											PROJECT INTERPHD2	2
				Margariti, S	6					3.60.2230 Sulfur Mustard	1					UNIVERSITY OF SURREY	5	Islamic Azad University Science And Research Branch	2	REACTIVE FUNCTIONAL POLYMERS	3											PUT	2
				Balard, H	6					3.85.554 Advanced Food Drying	1					UNIVERSITY OF TORONTO	5	Key Laboratory Of Synthetic And Natural Functional Molecular Chemistry Of Ministry Of Education	2	STUDIES IN SURFACE SCIENCE AND CATALYSIS	3											RESEARCH COUNCIL OF NORWAY	2
				Zhang, Zhengfang	6					3.85.741 Chitosan Packaging Films	1					BUFFALO STATE UNIVERSITY	4	Kwangwoon University College Of Engineering	2	THERMOCHIMICA ACTA	3											RESEARCH FUND FOR COAL AND STEEL OF THE EUROPEAN UNION	2
				Yang, Young Cheol	6					5.188.262 Diamond Films	1					DONGGUK UNIVERSITY	4	Kwangwoon University Department Of Chemical Engineering	2	ACS APPLIED NANO MATERIALS	2											SCIENTIFIC RESEARCH PROJECTS COORDINATION CENTER OF YILDIZ TECHNICAL UNIVERSITY TURKEY	2
				Bilgin-Eran, Belkis	6					5.30.21 High-tc Superconductors	1					EGYPTIAN KNOWLEDGE BANK EKB	4	Kyung Hee University Department Of Mechanical Engineering	2	ADVANCED POWDER TECHNOLOGY	2											SGS CANADA INC	2
				Park, Soo-Jin	6					7.109.2083 Boron Carbide	1					EGYPTIAN PETROLEUM RESEARCH INSTITUTE EPRI	4	Kyunghee University College Of Engineering	2	AICHE JOURNAL	2											SHAANXI PROVINCIAL SCIENCE AND DEVELOPMENT PROJECTS	2
				Schultz, J	6					7.139.1964 Spontaneous Combustion	1					ETH ZURICH	4	Monash Institute Of Pharmaceutical Sciences	2	ARABIAN JOURNAL OF CHEMISTRY	2											SPECIAL FUNDS FOR TECHNOLOGICAL DEVELOPMENT RESEARCH OF RESEARCH INSTITUTES FROM NATIONAL MINISTRY OF SCIENCE AND TECHNOLOGY	2
				Kalantzopoulos, A.	6					7.227.1513 Chemical Mechanical Polishing	1					HELMHOLTZ ASSOCIATION	4	Monash University Faculty Of Pharmacy And Pharmaceutical Sciences	2	ASIAN JOURNAL OF CHEMISTRY	2											SWEDISH RESEARCH COUNCIL FORMAS	2
				JAUBERT, Jean-Noel	5					7.260.999 Nuclear Fuel Behavior	1					INSTITUTO POLITECNICO DE BRAGANCA	4	Nanjing Tech University College Of Biotechnology And Pharmaceutical Engineering	2	ATMOSPHERIC ENVIRONMENT	2											SWISS NATIONAL SCIENCE FOUNDATION SNSF	2
				Infantes, Antonia	5					7.262.745 Energetic Materials	1					ISTANBUL TECHNICAL UNIVERSITY	4	National Polytechnic Institute Superior School Of Physics And Mathematics	2	BIORESOURCE TECHNOLOGY	2											TSINGHUA UNIVERSITY	2
				Santos, Jose	5					7.300.908 Asphalt Performance	1					KING ABDULLAH UNIVERSITY OF SCIENCE TECHNOLOGY	4	National Taiwan University College Of Bioresources And Agriculture	2	BULGARIAN CHEMICAL COMMUNICATIONS	2											VIEP	2
				Plata-Gryl, Maksymilian	5					8.124.10 Atmospheric Aerosols	1					KOREA RESEARCH INSTITUTE OF CHEMICAL TECHNOLOGY KRICT	4	National Taiwan University Department Of Agricultural Chemistry	2	CELLULOSE CHEMISTRY AND TECHNOLOGY	2											AALTO UNIVERSITY BIOINNOVATION CENTER	1
				Tumsek, Fatma	5					8.124.552 Air Pollution	1					KYUSHU UNIVERSITY	4	Northwest University College Of Chemistry And Materials Science	2	CEMENT AND CONCRETE RESEARCH	2											ACADEMIC BODY INVESTIGACION EN ZEOLITAS	1
				Williams, Daryl R.	5					8.140.718 Enhanced Oil Recovery	1					LEIBNIZ INSTITUT FUR POLYMERFORSCHUNG DRESDEN	4	Northwestern Polytechnical University School Of Science	2	CHEMCATCHEM	2											ACADEMIC BODY INVESTIGACION EN ZEOLITAS CA 95 PROMEP SEP	1
				Brendle, E	5											LEIPZIG UNIVERSITY	4	Polytechnic Institute Of Bragança School Of Technology And Management	2	CHEMICAL PAPERS	2											ADVANCED ENERGY CONSORTIUM AEC	1
				ALOthman, Zeid A.	5											MAX PLANCK SOCIETY	4	Poznan University Of Medical Sciences Faculty Of Pharmacy	2	CHEMOSPHERE	2											AECI	1
				JL OTEO	5											NORTHEAST FORESTRY UNIVERSITY CHINA	4	Poznan University Of Technology Faculty Of Chemical Technology	2	COLLOID AND POLYMER SCIENCE	2											AECID PCI	1
