# Supplementary material
Source: Research Square preprint supplement (doi:10.21203/rs.3.rs-10119958/v1)

**Graphical Abstract**


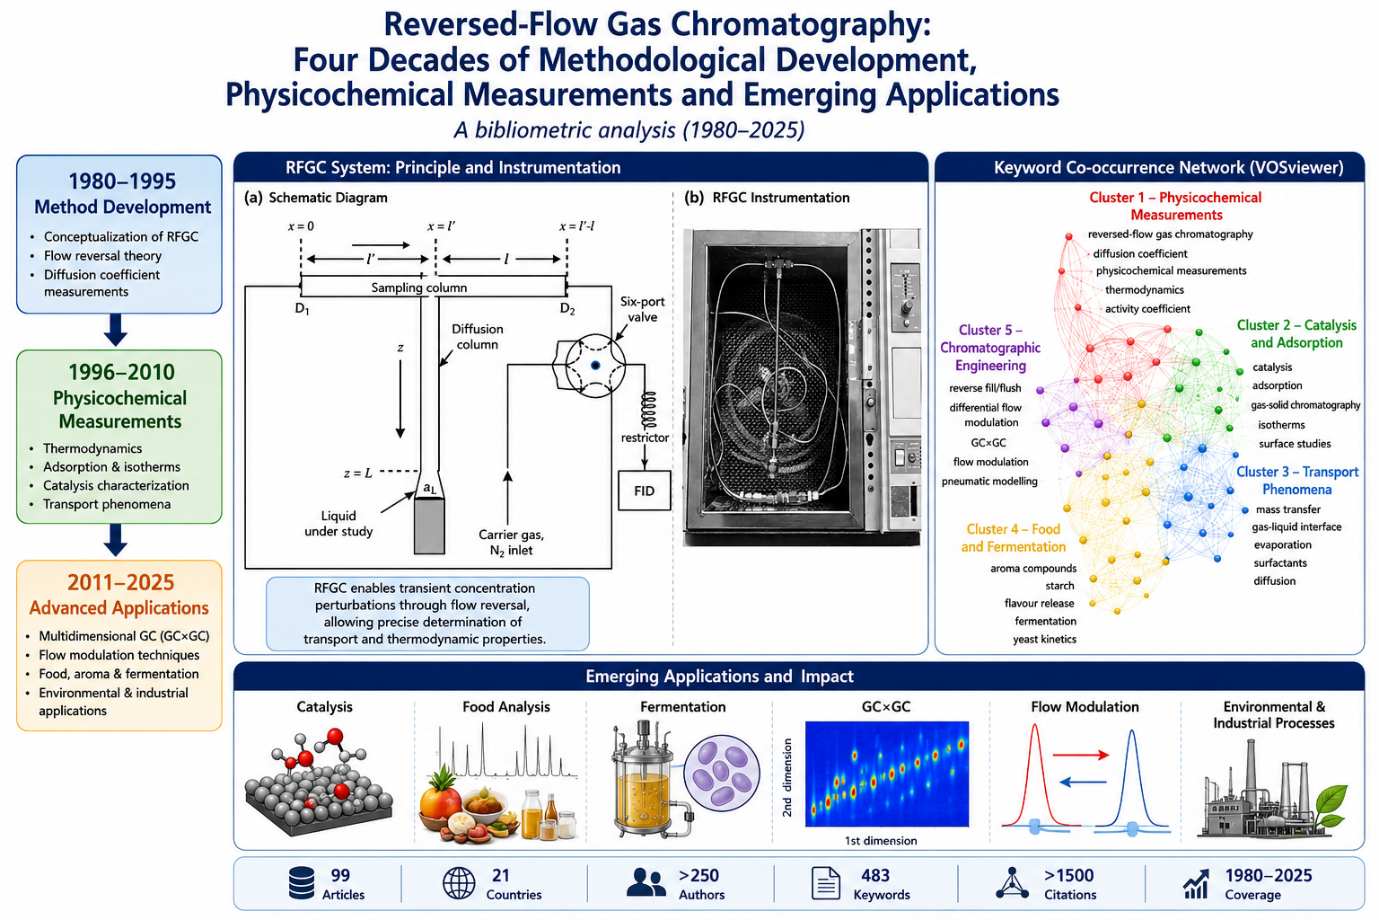

Supplement: Supplementary file 1 [file 47a3b86e86da3a5f4a31e1f0.docx]
